# Supplementary material for: Oxidative stress-dependent and -independent death of glioblastoma cells induced by non-thermal plasma-exposed solutions
Source: PubMed Central journal article supplement (PMC6754505; doi:10.1038/s41598-019-50136-w), 2019-09-20
Supplement: 41598_2019_50136_MOESM1_ESM.pdf [file 41598_2019_50136_MOESM1_ESM.pdf]

# **Oxidative stress-dependent and -independent death of glioblastoma cells induced by non-thermal plasma-exposed solutions**

**Hiromasa Tanaka<sup>1,2\*</sup>, Masaaki Mizuno<sup>2</sup>, Yuko Katsumata<sup>1</sup>, Kenji Ishikawa<sup>1</sup>,  
Hiroki Kondo<sup>1</sup>, Hiroshi Hashizume<sup>1</sup>, Yasumasa Okazaki<sup>3</sup>, Shinya Toyokuni<sup>3</sup>, Kae  
Nakamura<sup>4</sup>, Nobuhisa Yoshikawa<sup>4</sup>, Hiroaki Kajiyama<sup>4</sup>, Fumitaka Kikkawa<sup>4</sup>, and  
Masaru Hori<sup>1</sup>**

<sup>1</sup> Center for Low-temperature Plasma Sciences, Nagoya University, Furo-cho,  
Chikusa-ku, Nagoya 464-8603, Japan

<sup>2</sup> Center for Advanced Medicine and Clinical Research, Nagoya University Hospital,  
Tsurumai-cho 65, Showa-ku, Nagoya 466-8550, Japan

<sup>3</sup> Department of Pathology and Biological Responses, Nagoya University Graduate  
School of Medicine, Tsurumai-cho 65, Showa-ku, Nagoya 466-8550, Japan

<sup>4</sup> Department of Obstetrics and Gynecology, Nagoya University Graduate School of  
Medicine, Tsurumai-cho 65, Showa-ku, Nagoya 466-8550, Japan

\*To whom correspondence should be addressed.

E-mail: [htanaka@plasma.engg.nagoya-u.ac.jp](mailto:htanaka@plasma.engg.nagoya-u.ac.jp)

**Table S1: List of the 61 genes that were upregulated more than 2-fold by PAM.**

| rank | Normalized intensity {ratio} | Gene Symbol | Gene Name                                                          |
|------|------------------------------|-------------|--------------------------------------------------------------------|
| 1    | 17.317898                    | IL8         | interleukin 8                                                      |
| 2    | 7.204878                     | ATF3        | activating transcription factor 3                                  |
| 3    | 5.062256                     | CHAC1       | ChaC, cation transport regulator homolog 1 (E. coli)               |
| 4    | 4.127863                     | IER3        | immediate early response 3                                         |
| 5    | 3.887067                     | IL11        | interleukin 11                                                     |
| 6    | 3.523265                     | DUSP10      | dual specificity phosphatase 10                                    |
| 7    | 3.440324                     | CDKN1A      | cyclin-dependent kinase inhibitor 1A (p21, Cip1)                   |
| 8    | 3.395199                     | RND3        | Rho family GTPase 3                                                |
| 9    | 3.245442                     | GADD45A     | growth arrest and DNA-damage-inducible, alpha                      |
| 10   | 3.106973                     | MYC         | v-myc myelocytomatosis viral oncogene homolog (avian)              |
| 11   | 3.087178                     | CTGF        | connective tissue growth factor                                    |
| 12   | 3.080271                     | SNAI2       | snail homolog 2 (Drosophila)                                       |
| 13   | 3.038008                     | DUSP6       | dual specificity phosphatase 6                                     |
| 14   | 3.018653                     | GADD45B     | growth arrest and DNA-damage-inducible, beta                       |
| 15   | 3.010193                     | MEFV        | Mediterranean fever                                                |
| 16   | 2.851969                     | LITAF       | lipopolysaccharide-induced TNF factor                              |
| 17   | 2.806354                     | CYR61       | cysteine-rich, angiogenic inducer, 61                              |
| 18   | 2.79655                      | JUN         | jun proto-oncogene                                                 |
| 19   | 2.584015                     | COL11A1     | collagen, type XI, alpha 1                                         |
| 20   | 2.498025                     | PTAFR       | platelet-activating factor receptor                                |
| 21   | 2.481692                     | ZFP36       | zinc finger protein 36, C3H type, homolog (mouse)                  |
| 22   | 2.457079                     | RASSF4      | Ras association (RalGDS/AF-6) domain family member 4               |
| 23   | 2.452987                     | HMGA2       | high mobility group AT-hook 2                                      |
| 24   | 2.436146                     | DDIT3       | DNA-damage-inducible transcript 3                                  |
| 25   | 2.408367                     | ERRFI1      | ERBB receptor feedback inhibitor 1                                 |
| 26   | 2.405796                     | SEMA7A      | semaphorin 7A, GPI membrane anchor (John Milton Hagen blood group) |
| 27   | 2.39901                      | PLK3        | polo-like kinase 3                                                 |
| 28   | 2.388136                     | GYPA        | glycophorin A (MNS blood group)                                    |
| 29   | 2.38673                      | DUSP2       | dual specificity phosphatase 2                                     |
| 30   | 2.372008                     | HBEGF       | heparin-binding EGF-like growth factor                             |

|    |          |           |                                                                                     |
|----|----------|-----------|-------------------------------------------------------------------------------------|
| 31 | 2.365602 | FOS       | FBJ murine osteosarcoma viral oncogene homolog                                      |
| 32 | 2.3536   | IFITM5    | interferon induced transmembrane protein 5                                          |
| 33 | 2.33729  | KLF6      | Kruppel-like factor 6                                                               |
| 34 | 2.281947 | THOC2     | THO complex 2                                                                       |
| 35 | 2.233788 | GCM1      | glial cells missing homolog 1 (Drosophila)                                          |
| 36 | 2.233557 | EGR1      | early growth response 1                                                             |
| 37 | 2.210247 | A1BG      | alpha-1-B glycoprotein                                                              |
| 38 | 2.183498 | TRIB1     | tribbles homolog 1 (Drosophila)                                                     |
| 39 | 2.179448 | PLAU      | plasminogen activator, urokinase                                                    |
| 40 | 2.140145 | ITFG1     | integrin alpha FG-GAP repeat containing 1                                           |
| 41 | 2.128974 | ABL2      | v-abl Abelson murine leukemia viral oncogene homolog 2                              |
| 42 | 2.124016 | SLC30A1   | solute carrier family 30 (zinc transporter), member 1                               |
| 43 | 2.102962 | LBX1      | ladybird homeobox 1                                                                 |
| 44 | 2.093884 | VAMP5     | vesicle-associated membrane protein 5 (myobrevin)                                   |
| 45 | 2.0832   | SCLY      | selenocysteine lyase                                                                |
| 46 | 2.080763 | RUNX1-IT1 | RUNX1 intronic transcript 1 (non-protein coding)                                    |
| 47 | 2.073478 | LTBP2     | latent transforming growth factor beta binding protein 2                            |
| 48 | 2.067477 | HMOX1     | heme oxygenase (decycling) 1                                                        |
| 49 | 2.056835 | IER2      | immediate early response 2                                                          |
| 50 | 2.056613 | ABL2      | v-abl Abelson murine leukemia viral oncogene homolog 2                              |
| 51 | 2.045163 | UTS2R     | urotensin 2 receptor                                                                |
| 52 | 2.037542 | DIDO1     | death inducer-obliterator 1                                                         |
| 53 | 2.032995 | ZFP36L1   | zinc finger protein 36, C3H type-like 1                                             |
| 54 | 2.031219 | SGK1      | serum/glucocorticoid regulated kinase 1                                             |
| 55 | 2.030602 | NFKBIA    | nuclear factor of kappa light polypeptide gene enhancer in B-cells inhibitor, alpha |
| 56 | 2.028303 | SERTAD1   | SERTA domain containing 1                                                           |
| 57 | 2.0219   | SORBS2    | sorbin and SH3 domain containing 2                                                  |
| 58 | 2.016448 | CLDN10    | claudin 10                                                                          |
| 59 | 2.010364 | DUSP1     | dual specificity phosphatase 1                                                      |
| 60 | 2.006636 | STC2      | stanniocalcin 2                                                                     |
| 61 | 2.000084 | EAF1      | ELL associated factor 1                                                             |

a

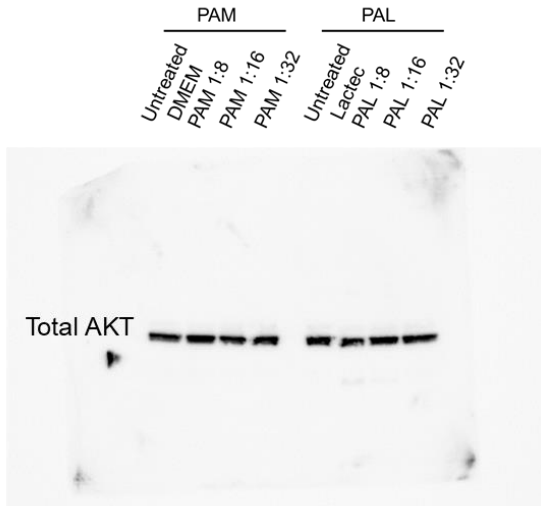

b

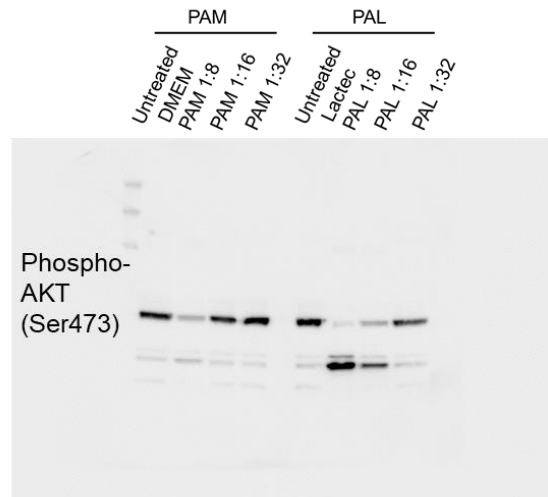

c

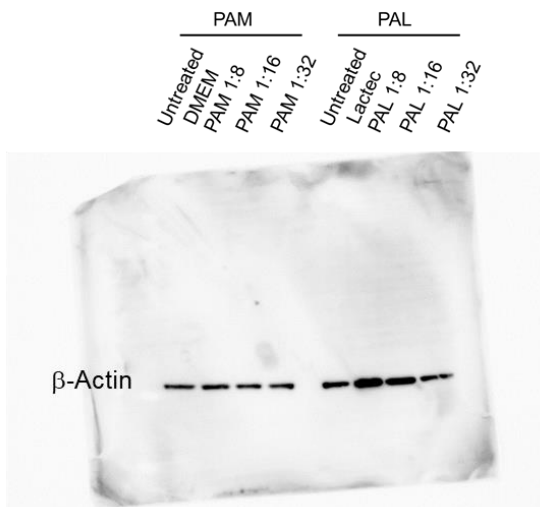

Figure S1: Full length blots of Figure 1
